# Supplementary material for: Synthesis of C12-C18 Fatty Acid Isobornyl Esters
Source: MDPI journal article supplement (doi:10.3390/molecules28227510), 2023-11-09
Supplement: s1 [file s1]

## Supporting Information

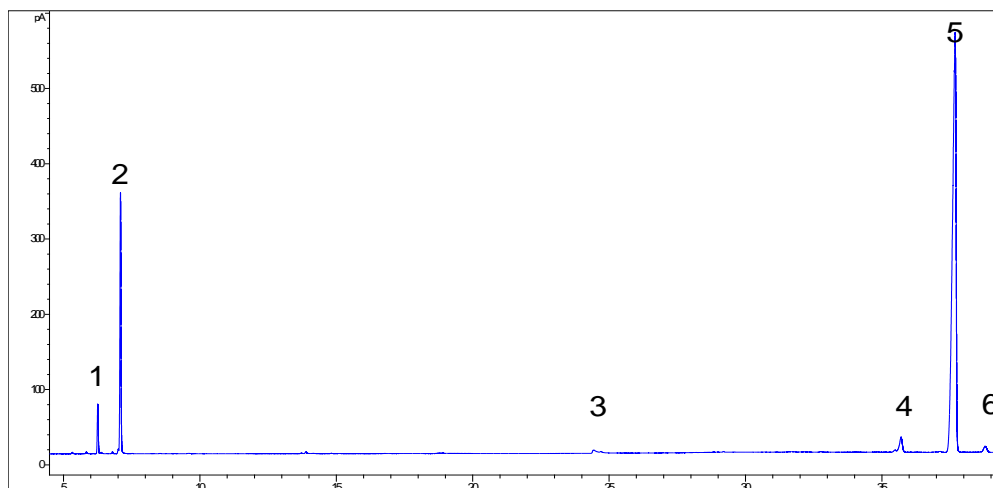

**Figure S1.** GC spectrum of products after removal of lauric acid.

Note: 1. tricyclene(CAS:508-32-7); 2. camphene; 3. lauric acid; 4. Fenchyl laurate; 5. isobornyl laurate; 6. terpinyl laurate.

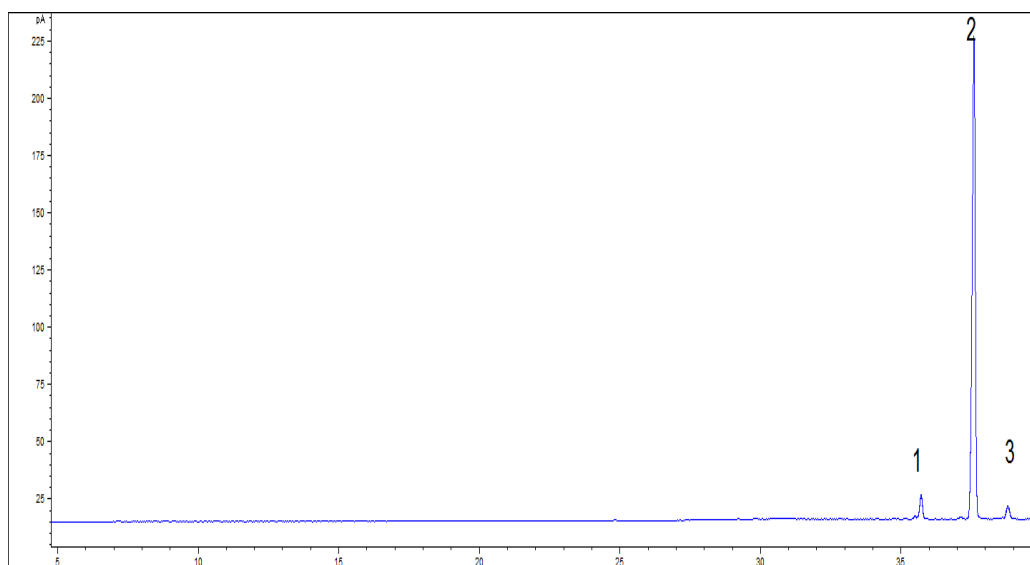

**Figure S2.** GC spectrum of products after removal of lauric acid and camphene.

Note: 1. Fenchyl laurate; 2. isobornyl laurate; 3. terpinyl laurate.

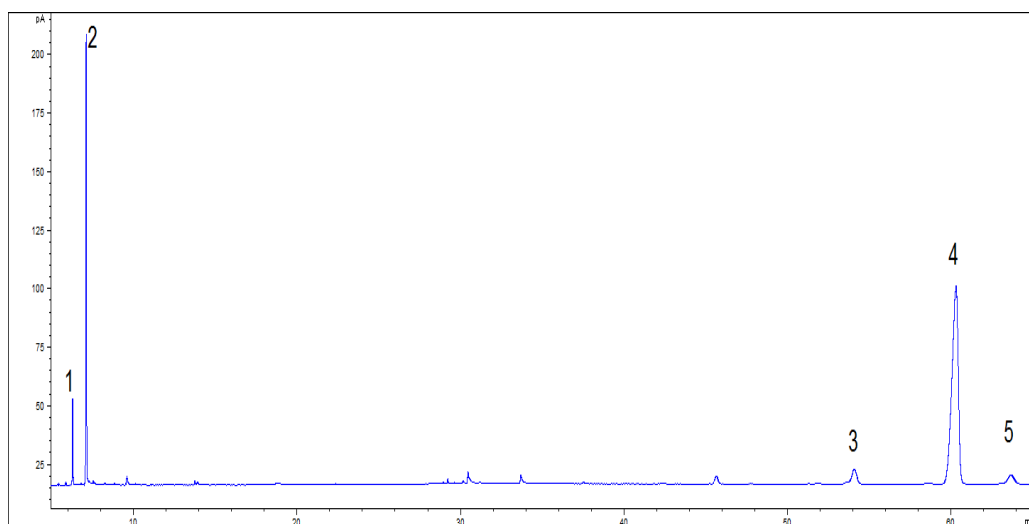

**Figure S3.** GC spectrum of product after removal of stearic acid. Note: 1. Tricyclene(CAS:508-32-7); 2. Camphene; 3. fenvalerate stearate; 4. isobornyl stearate; 5. terpinyl stearate.

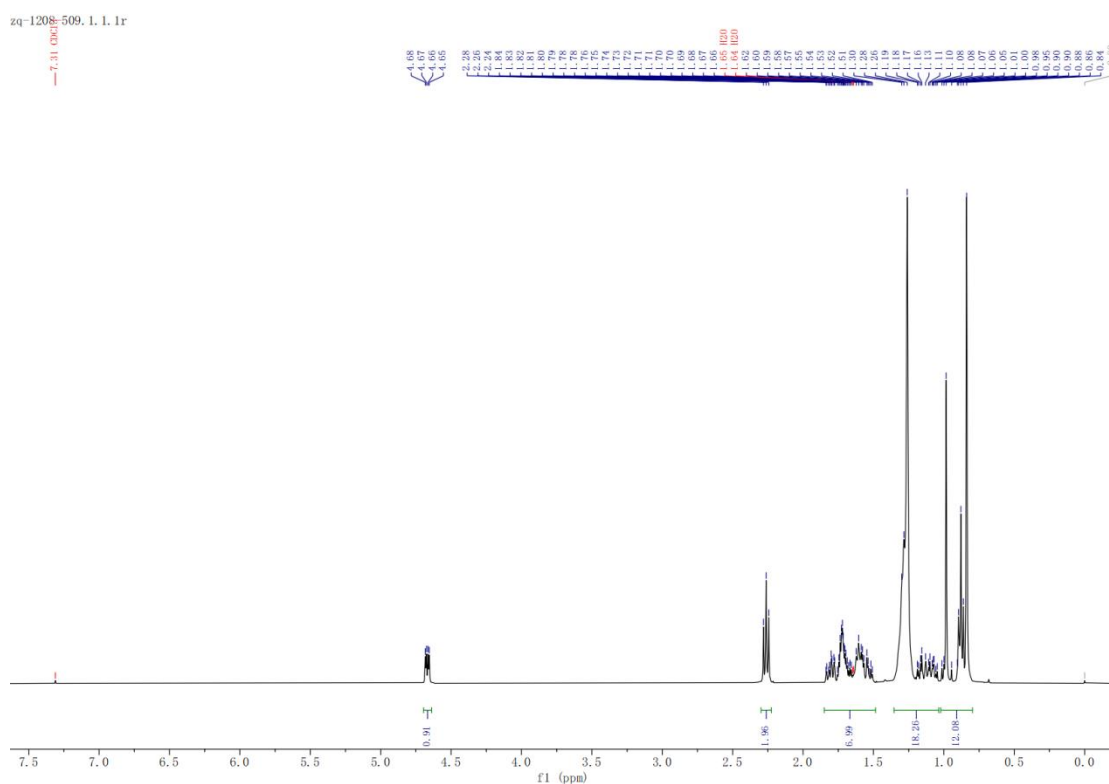

**Figure S4.**  $^1\text{H}$  NMR spectrum of isobornyl laurate.

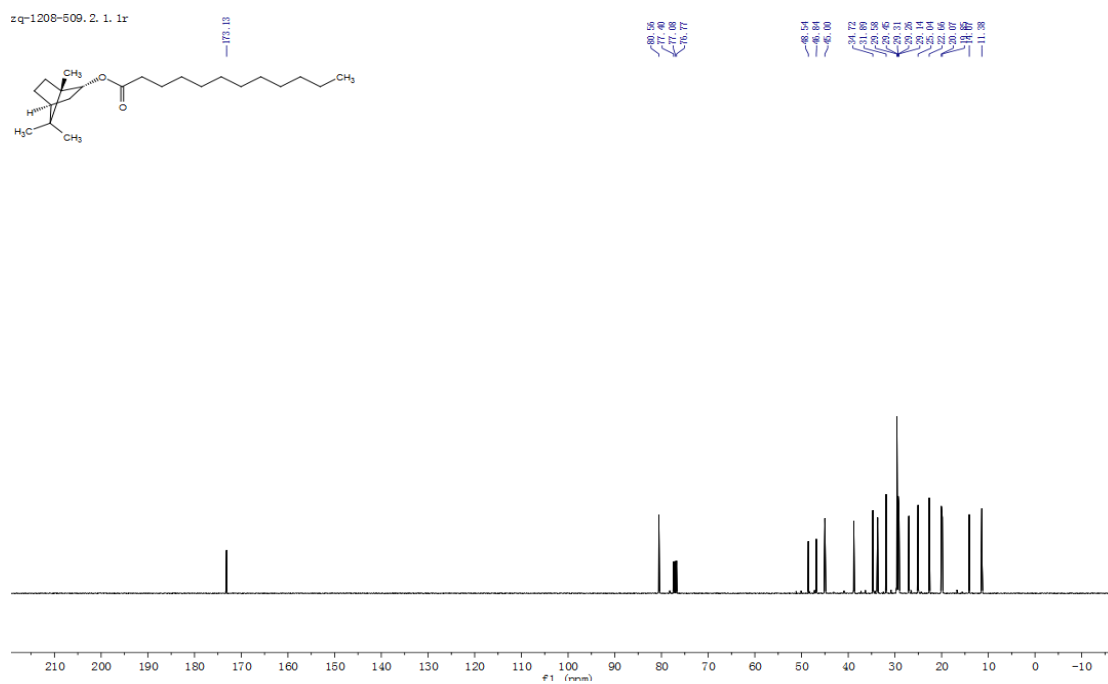

**Figure S5.**  $^{13}\text{C}$  NMR spectrum of isobornyl laurate.

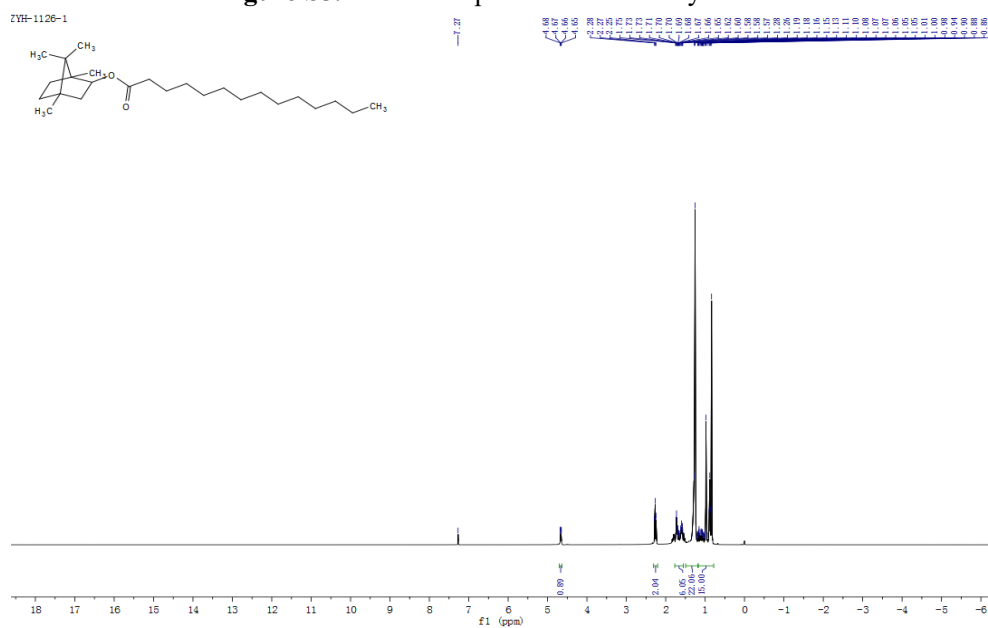

**Figure S6.**  $^1\text{H}$  NMR spectrum of isobornyl myristate.



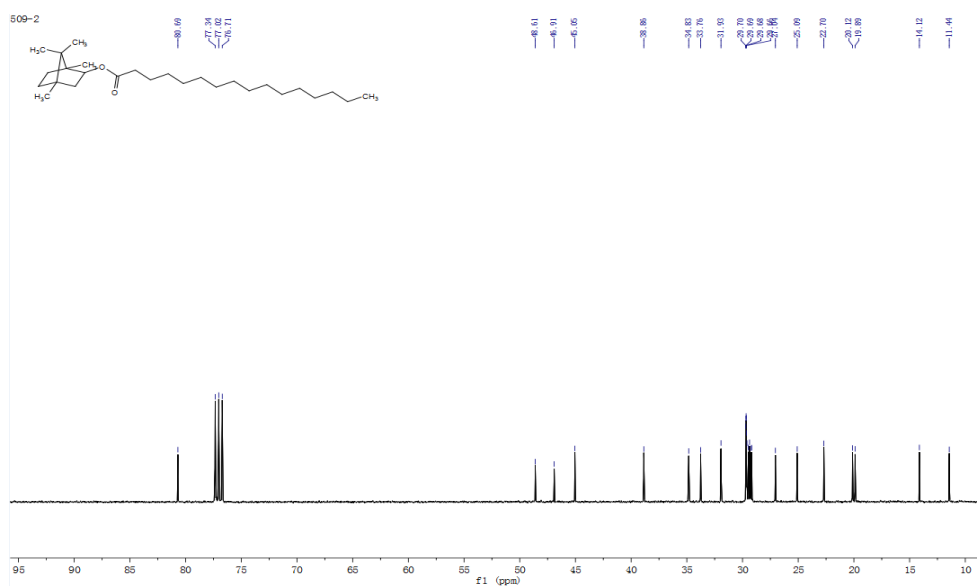

Figure S9.  $^{13}\text{C}$  NMR spectrum of isobornyl palmitate.

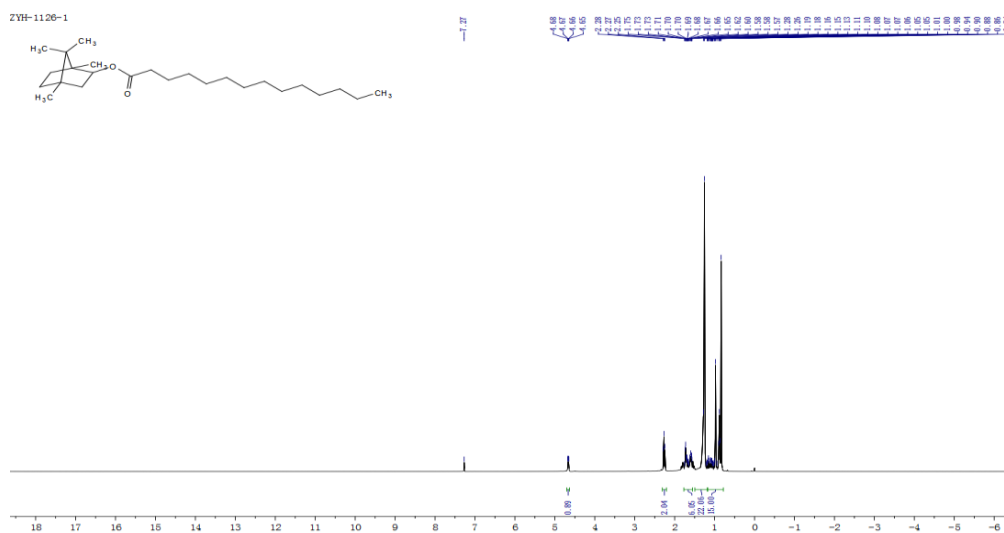

Figure S10.  $^1\text{H}$  NMR spectrum of isobornyl stearate.

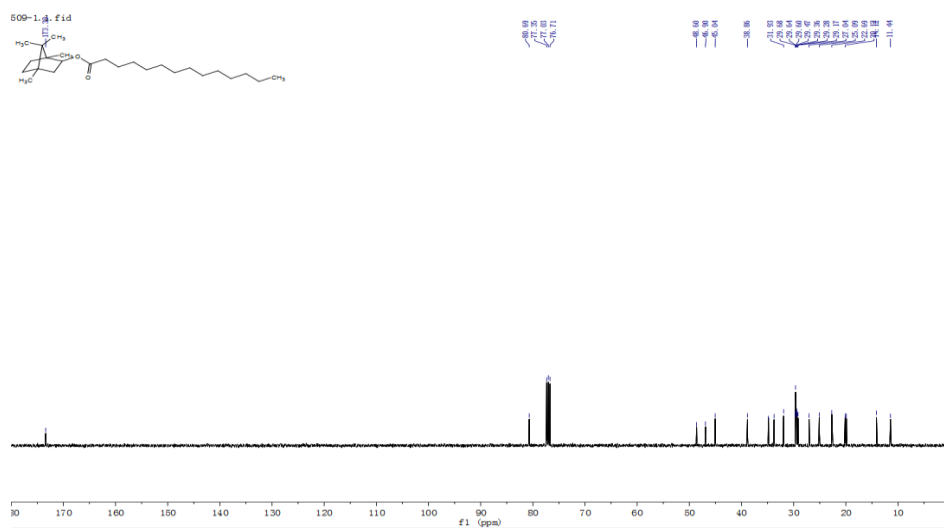

Figure S11.  $^{13}\text{C}$  NMR spectrum of isobornyl stearate.
